# Supplementary material for: Analysis of Fatty Acids, Amino Acids and Volatile Profile of Apple By-Products by Gas Chromatography-Mass Spectrometry
Source: MDPI journal article supplement (doi:10.3390/molecules27061987), 2022-03-19
Supplement: s1 [file s1]

**Table S1.** Biscuits volatile aroma compounds

| Volatile compounds     | BCS                       | BJS                       | BJP                       | BGS                       | BGP                       | Odour perception                                                      |
|------------------------|---------------------------|---------------------------|---------------------------|---------------------------|---------------------------|-----------------------------------------------------------------------|
| Alcohols               |                           |                           |                           |                           |                           |                                                                       |
| 1-hexanol              | n.d.                      | 0.80 ± 0.02 <sup>a</sup>  | 1.30 ± 0.02 <sup>b</sup>  | 2.10 ± 0.02 <sup>c</sup>  | 2.70 ± 0.03 <sup>d</sup>  | Green, sweet, herbaceous, fermented note, fruity, apple-skin and oily |
| Phenol                 | 1.03 ± 0.02               | n.d.                      | n.d.                      | n.d.                      | n.d.                      | Phenol                                                                |
| Total                  | 1.03 ± 0.02 <sup>b</sup>  | 0.80 ± 0.02 <sup>a</sup>  | 1.30 ± 0.02 <sup>bc</sup> | 2.10 ± 0.02 <sup>d</sup>  | 2.70 ± 0.03 <sup>e</sup>  |                                                                       |
| Esters                 |                           |                           |                           |                           |                           |                                                                       |
| Butyl acetate          | n.d.                      | 12.66 ± 0.04 <sup>d</sup> | 12.01 ± 0.03 <sup>c</sup> | 11.09 ± 0.05 <sup>b</sup> | 10.23 ± 0.03 <sup>a</sup> | Sweet, ripe banana, ethereal                                          |
| Hexyl acetate          | 5.23 ± 0.04 <sup>a</sup>  | 14.80 ± 0.04 <sup>e</sup> | 10.89 ± 0.07 <sup>b</sup> | 13.90 ± 0.05 <sup>d</sup> | 11.02 ± 0.07 <sup>c</sup> | Fresh, fruity, apple, pear and banana note                            |
| 2-methylbutyl acetate  | 0.34 ± 0.03 <sup>a</sup>  | 3.44 ± 0.22 <sup>b</sup>  | 3.67 ± 0.21 <sup>b</sup>  | 4.09 ± 0.04 <sup>c</sup>  | 5.03 ± 0.03 <sup>d</sup>  | Sweet, fruity, ripe banana, pear, apple                               |
| Total                  | 5.57 ± 0.07               | 30.90 ± 0.30              | 26.57 ± 0.31              | 29.08 ± 0.15              | 26.28 ± 0.13              |                                                                       |
| Aldehydes              |                           |                           |                           |                           |                           |                                                                       |
| Benzaldehyde           | 2.90 ± 0.05 <sup>a</sup>  | 9.99 ± 0.11 <sup>e</sup>  | 8.05 ± 0.23 <sup>d</sup>  | 5.03 ± 0.11 <sup>c</sup>  | 4.08 ± 0.22 <sup>b</sup>  | Almond, fruity, powdery, nutty                                        |
| Hexanal                | 53.21 ± 0.20 <sup>e</sup> | 7.05 ± 0.10 <sup>a</sup>  | 11.55 ± 0.21 <sup>b</sup> | 12.03 ± 0.13 <sup>c</sup> | 13.53 ± 0.15 <sup>d</sup> | Intense green, aldehydic odor, off flavor                             |
| Nonanal                | 7.12 ± 0.03 <sup>c</sup>  | 3.04 ± 0.02 <sup>a</sup>  | 3.55 ± 0.04 <sup>ab</sup> | 7.25 ± 0.05 <sup>c</sup>  | 8.01 ± 0.06 <sup>d</sup>  | Green, floral, sweet orange, rose, waxy                               |
| Phenylacetaldehyde     | n.d.                      | 6.01 ± 0.05 <sup>a</sup>  | 6.11 ± 0.09 <sup>a</sup>  | 6.42 ± 0.04 <sup>a</sup>  | 6.75 ± 0.05 <sup>ab</sup> | Fatty, fruity, cake crust, bready                                     |
| Methional              | n.d.                      | 1.55 ± 0.03 <sup>a</sup>  | 2.01 ± 0.21 <sup>b</sup>  | 3.55 ± 0.07 <sup>c</sup>  | 5.55 ± 0.08 <sup>d</sup>  | Potato, damp                                                          |
| 3-methyl-butanal       | 1.67 ± 0.05 <sup>ab</sup> | 4.22 ± 0.03 <sup>e</sup>  | 3.77 ± 0.22 <sup>d</sup>  | 2.01 ± 0.11 <sup>c</sup>  | 1.09 ± 0.13 <sup>a</sup>  | Dried fruits, nutty, cocoa, chocolate, fatty                          |
| 2-methyl-butanal       | 1.99 ± 0.02 <sup>a</sup>  | 4.33 ± 0.03 <sup>d</sup>  | 3.87 ± 0.02 <sup>c</sup>  | 5.03 ± 0.03 <sup>d</sup>  | 2.66 ± 0.05 <sup>b</sup>  | Malty, cacao, chocolate, coffee, caramellike, nutty, rummy, malty     |
| 2-methyl-propanal      | 0.76 ± 0.03 <sup>a</sup>  | 1.65 ± 0.02 <sup>b</sup>  | 2.55 ± 0.04 <sup>c</sup>  | 1.89 ± 0.05 <sup>b</sup>  | 3.67 ± 0.03 <sup>d</sup>  | Wine, solvent, malty, fruity                                          |
| Total                  | 67.57 ± 0.38 <sup>e</sup> | 37.84 ± 0.39 <sup>a</sup> | 41.46 ± 1.02 <sup>b</sup> | 43.21 ± 0.59 <sup>c</sup> | 45.34 ± 0.77 <sup>d</sup> |                                                                       |
| Ketones                |                           |                           |                           |                           |                           |                                                                       |
| 2-heptanone            | 0.88 ± 0.13 <sup>a</sup>  | 13.99 ± 0.22 <sup>e</sup> | 13.27 ± 0.37 <sup>d</sup> | 11.77 ± 0.03 <sup>c</sup> | 10.57 ± 0.33 <sup>b</sup> | Cheese, fruity, ketonic, green banana, with a creamy nuance           |
| Acetophenone           | 4.30 ± 0.03 <sup>a</sup>  | 8.75 ± 0.05 <sup>e</sup>  | 7.77 ± 0.06 <sup>d</sup>  | 6.11 ± 0.03 <sup>c</sup>  | 5.21 ± 0.02 <sup>b</sup>  | Floral, almond, nutty, must, spicy                                    |
| Total                  | 5.18 ± 0.16 <sup>a</sup>  | 22.74 ± 0.27 <sup>e</sup> | 21.04 ± 0.43 <sup>d</sup> | 17.88 ± 0.06 <sup>c</sup> | 15.78 ± 0.35 <sup>b</sup> |                                                                       |
| Terpens and terpenoids |                           |                           |                           |                           |                           |                                                                       |

|                          |                           |                          |                          |                          |                          |                                    |
|--------------------------|---------------------------|--------------------------|--------------------------|--------------------------|--------------------------|------------------------------------|
| β -myrcene               | 0.79 ± 0.02 <sup>a</sup>  | n.d.                     | 1.39 ± 0.03 <sup>b</sup> | n.d.                     | 3.78 ± 0.05 <sup>c</sup> | Herbaceous, woody, spice, balsamic |
| D-limonene               | 0.69 ± 0.03 <sup>b</sup>  | 2.99 ± 0.04 <sup>d</sup> | 2.55 ± 0.02 <sup>c</sup> | 0.30 ± 0.01 <sup>a</sup> | 0.20 ± 0.02 <sup>a</sup> | Citrus, fresh, sweet               |
| <b>Total</b>             | 1.48 ± 0.05 <sup>b</sup>  | 2.99 ± 0.04 <sup>c</sup> | 3.94 ± 0.05 <sup>d</sup> | 0.30 ± 0.01 <sup>a</sup> | 3.96 ± 0.07 <sup>d</sup> |                                    |
| <b>Acids</b>             |                           |                          |                          |                          |                          |                                    |
| Benzoic acid             | 15.03 ± 0.22 <sup>e</sup> | 0.30 ± 0.02 <sup>a</sup> | 1.64 ± 0.03 <sup>b</sup> | 3.20 ± 0.04 <sup>c</sup> | 3.67 ± 0.03 <sup>d</sup> | Fade balsamic                      |
| <b>Total</b>             | 15.03 ± 0.22 <sup>e</sup> | 0.30 ± 0.02 <sup>a</sup> | 1.64 ± 0.03 <sup>b</sup> | 3.20 ± 0.04 <sup>c</sup> | 3.67 ± 0.03 <sup>d</sup> |                                    |
| <b>Others</b>            |                           |                          |                          |                          |                          |                                    |
| Ethyl 2,4-dioxohexanoate | 2.10 ± 0.05 <sup>a</sup>  | 4.50 ± 0.03              | 4.05 ± 0.06 <sup>b</sup> | 4.23 ± 0.07 <sup>b</sup> | 2.25 ± 0.05 <sup>a</sup> | Apple peel, fruit                  |
| Dimethyl disulfide       | 1.96 ± 0.07               | n.d.                     | n.d.                     | n.d.                     | n.d.                     | Vegetal, sulfurous, cabbage, malt  |
| <b>Total</b>             | 4.06 ± 0.12 <sup>b</sup>  | 4.50 ± 0.03 <sup>b</sup> | 4.05 ± 0.06 <sup>b</sup> | 4.23 ± 0.07 <sup>b</sup> | 2.25 ± 0.05 <sup>a</sup> |                                    |

**Table S2.** Used reagents list

| Used reagent          | Determination | Company, city, country)            |
|-----------------------|---------------|------------------------------------|
| Methanol              | Fatty acids   | Sigma Aldrich (Steinheim, Germany) |
| Chloroform            | Fatty acids   | Sigma Aldrich (Steinheim, Germany) |
| Potassium chloride    | Fatty acids   | Sigma Aldrich (Steinheim, Germany) |
| Sodium sulphate       | Fatty acids   | Sigma Aldrich (Steinheim, Germany) |
| Trichloroacetic acid  | Amino-acids   | Sigma Aldrich (Steinheim, Germany) |
| 15N-glycine 99 atom % | Amino-acids   | Sigma Aldrich (Steinheim, Germany) |
